# Supplementary material for: Evaluation and Validation of Assembling Corrected PacBio Long Reads for Microbial Genome Completion via Hybrid Approaches
Source: PubMed Central journal article supplement (PMC4671558; doi:10.1371/journal.pone.0144305), 2015-12-07
Supplement: pone.0144305.s004.pdf [file pone.0144305.s004.pdf]

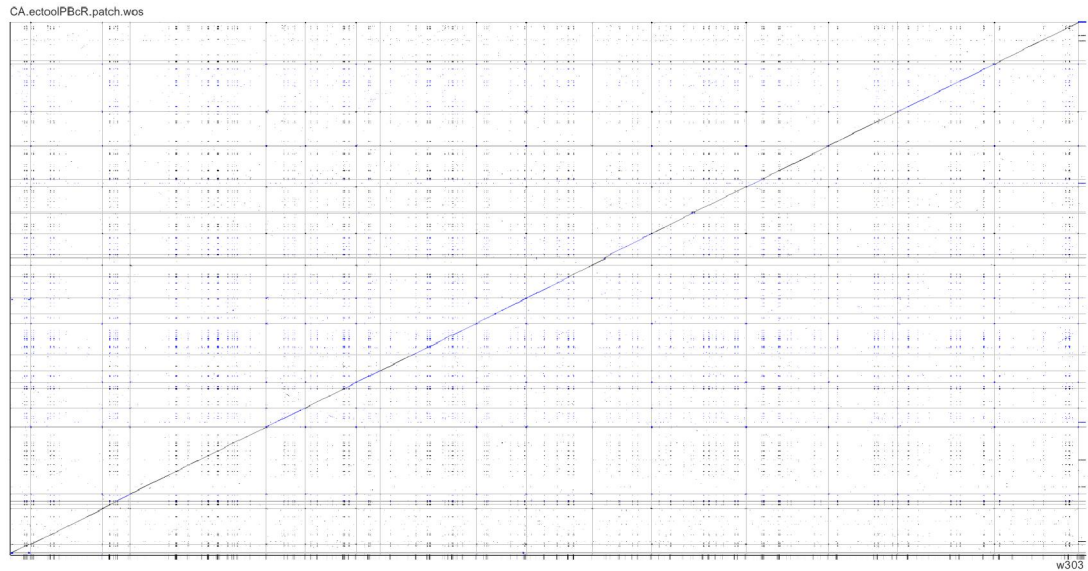

Figure A Dot plots of sequence assembly for *S. cerevisiae* W303. Assembly produced by Patch using runCA-assembled contigs and ECTools-corrected long reads as inputs. (Reference genome: 18 scaffolds from [NCBI](https://www.ncbi.nlm.nih.gov/assembly/gca000000000/))

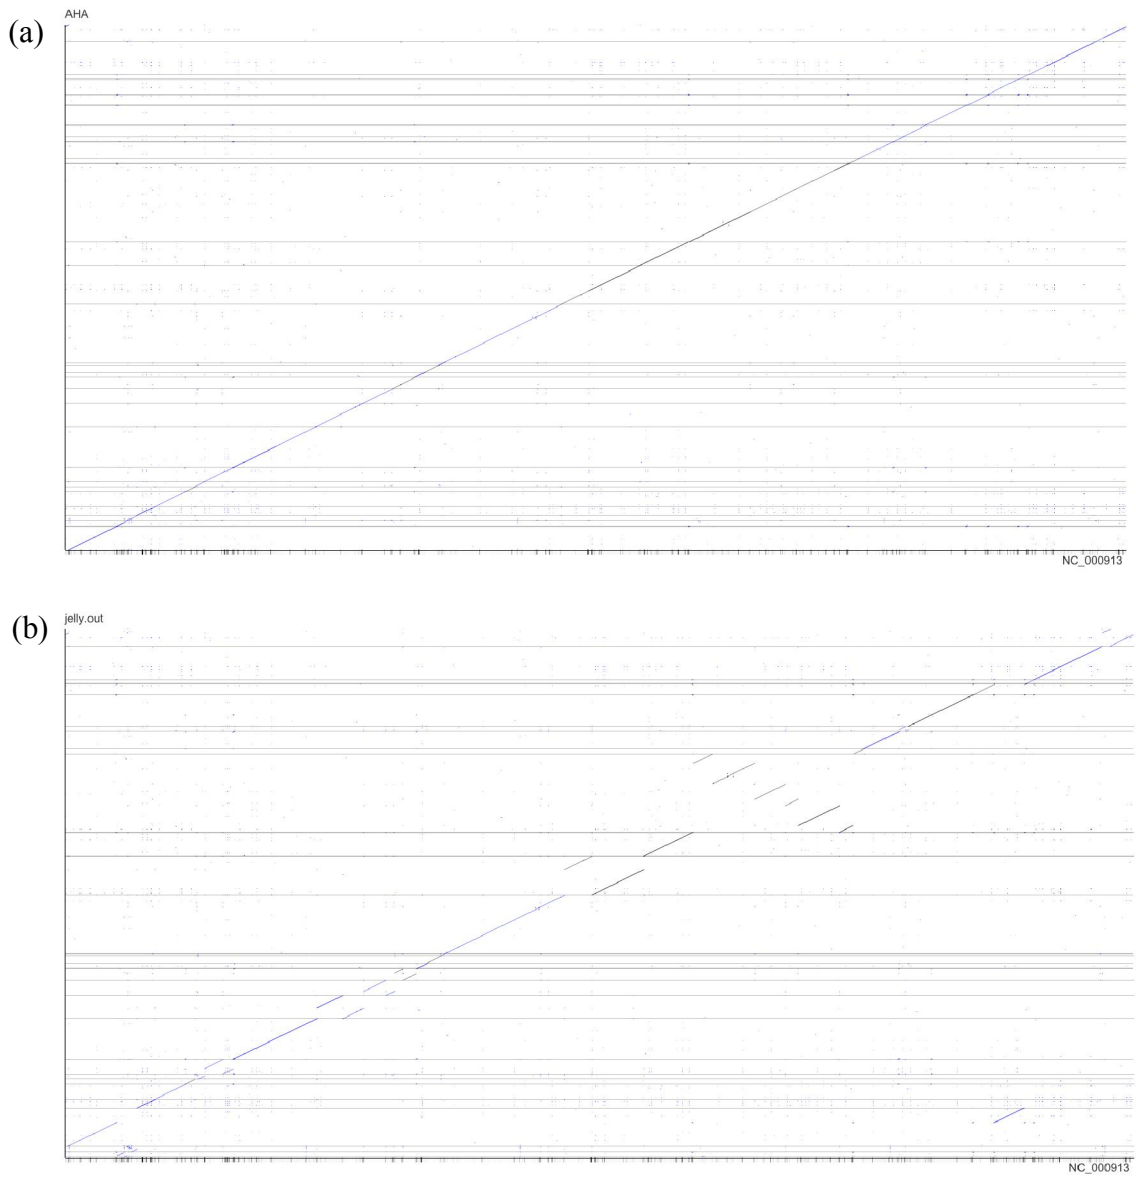

Figure B Dot plots of sequence assemblies produced by (a) AHA and (b) AHA followed by PBJelly using Abyss-assembled contigs and SMRT1 as inputs.

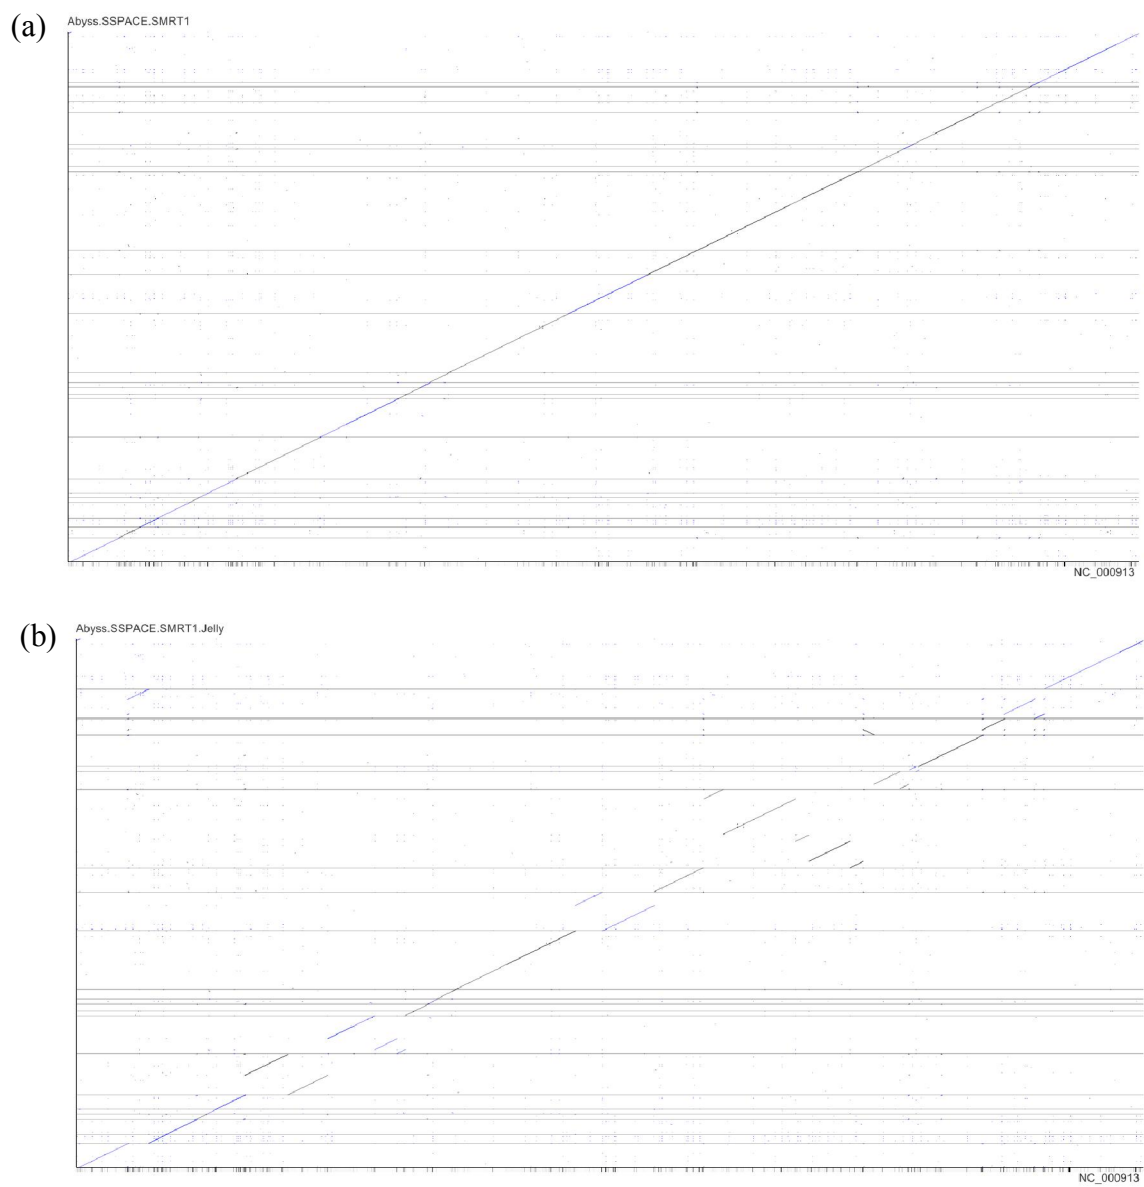

Figure C Dot plots of sequence assemblies produced by (a) SSPACE-LongRead and (b) SSPACE-LongRead followed by PBJelly using Abyss-assembled contigs and SMRT1 as inputs.

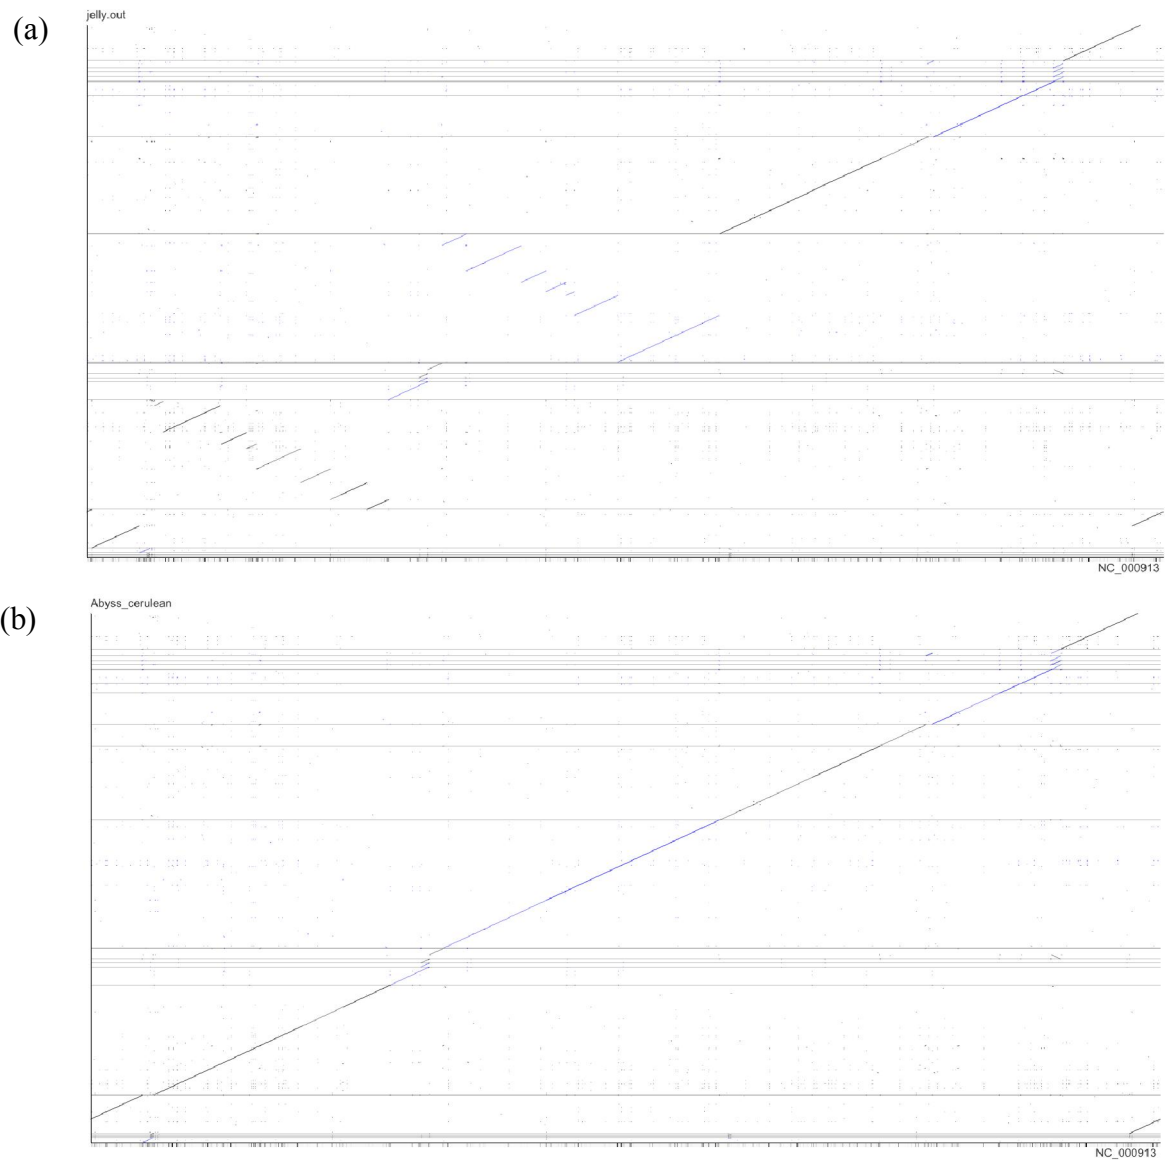

Figure D Dot plots of sequence assemblies produced by Cerulean (a) via post-process with PBJelly and (b) without PBJelly using Abyss-assembled contigs and SMRT1 as inputs.
